# Supplementary material for: Home-Based Titration with Duodenal Infusion of Levodopa-Carbidopa Intestinal Gel in People with Parkinson's Disease: An Observational Feasibility Study
Source: Parkinsons Dis. 2024 Apr 8;2024:5522824. doi: 10.1155/2024/5522824 (PMC11018374; doi:10.1155/2024/5522824)
Supplement: Supplementary Materials — Supplementary Files S1 and S2 include the patient-reported evaluation measures (PREM) questionnaires for both relatives and included PwPs. [file 5522824.f1.zip]

Archive with 2 entries (2 files):
- Home titration PREM S1.docx
- Home titration PREM S2.docx
